# Supplementary material for: Emulating Earth system model temperatures with MESMER: from global mean temperature trajectories to grid-point-level realizations on land
Source: Copernicus journal article supplement (doi:10.5194/esd-11-139-2020), 2020-02-17
Supplement: Supplementary file [file esd-11-139-2020-supplement.pdf]

Supplement of Earth Syst. Dynam., 11, 139–159, 2020  
<https://doi.org/10.5194/esd-11-139-2020-supplement>  
© Author(s) 2020. This work is distributed under  
the Creative Commons Attribution 4.0 License.

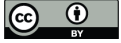

*Supplement of*

## **Emulating Earth system model temperatures with MESMER: from global mean temperature trajectories to grid-point-level realizations on land**

**Lea Beusch et al.**

*Correspondence to:* Lea Beusch (lea.beusch@env.ethz.ch)

The copyright of individual parts of the supplement might differ from the CC BY 4.0 License.

Shapiro-Wilk test for normality with controlling the false discovery rate at  $\alpha_{FDR} = 0.1$

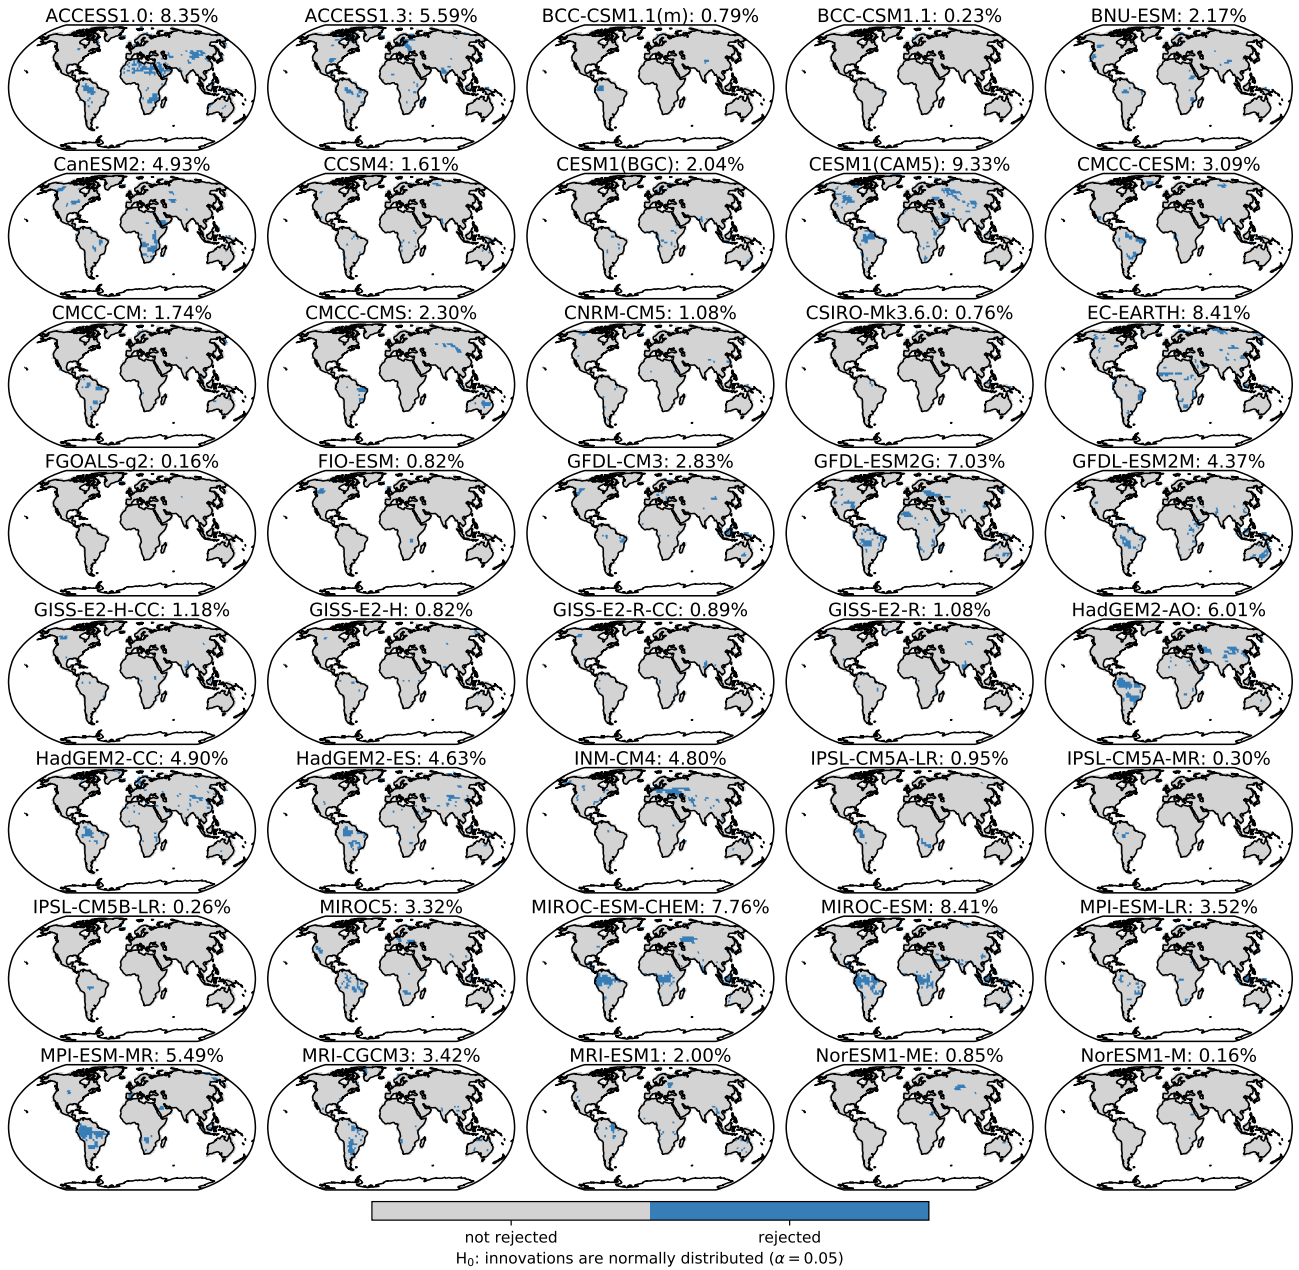

**Figure S1.** Shapiro-Wilk test for normality with  $H_0$ : the data are normally distributed (Steinskog et al., 2007) and controlling the False Discovery Rate (FDR, Wilks, 2016) at 10% for the local residual variability innovations  $\nu_{s,t}$  of the training runs.

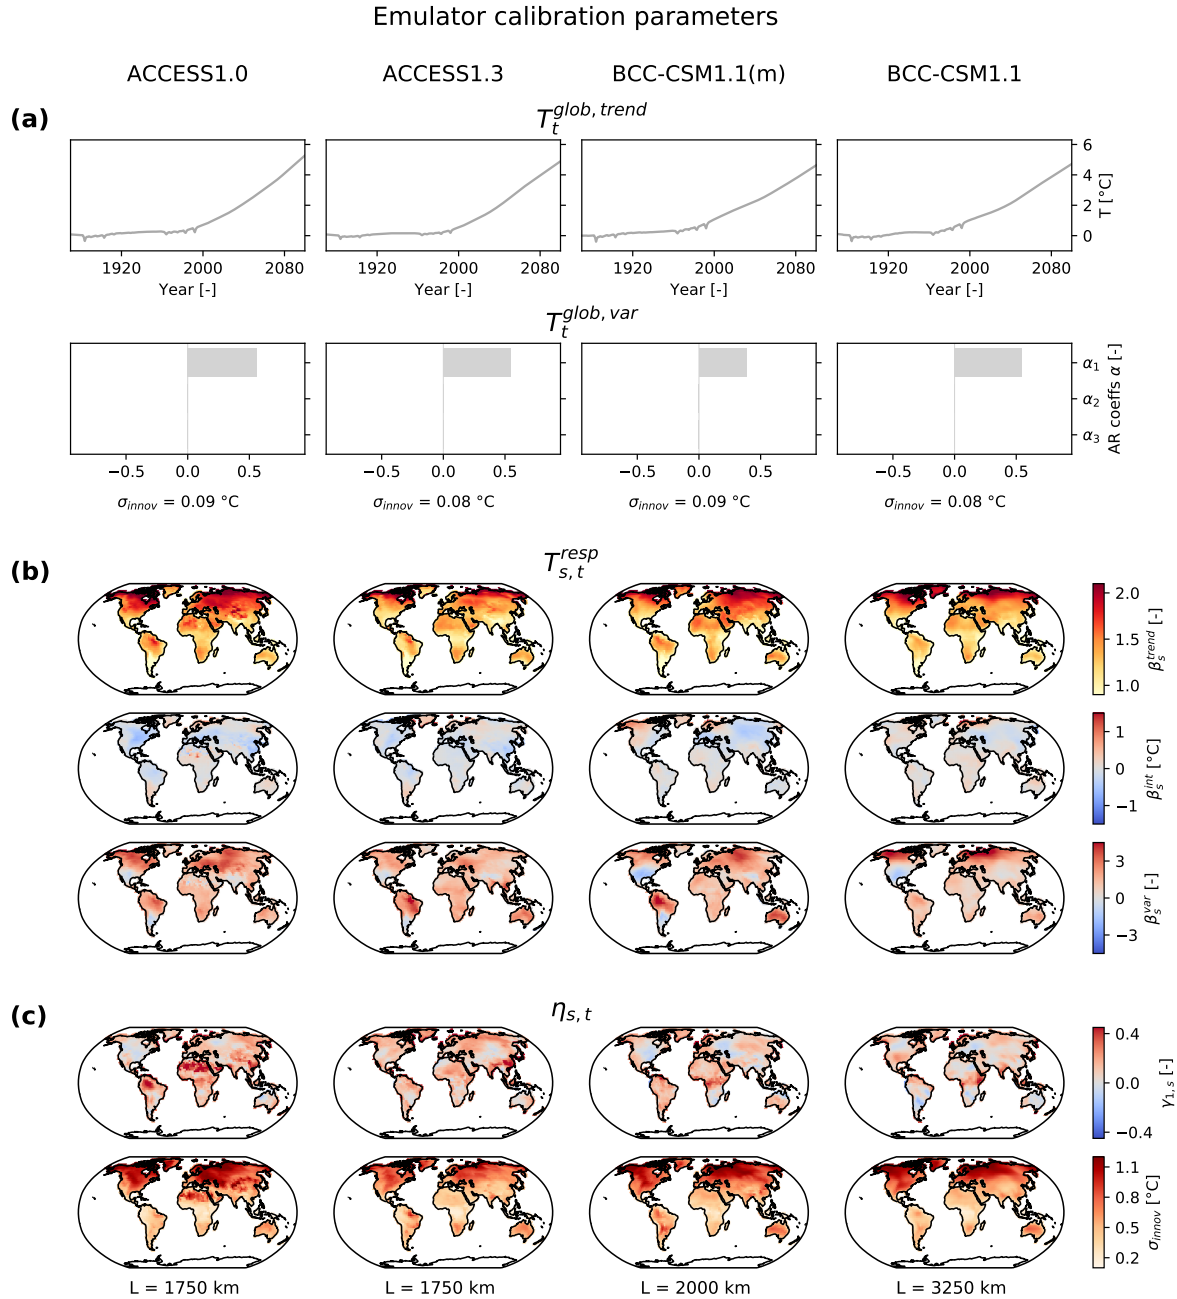

**Figure S2.** Emulator calibration parameters (rows) for four climate models (columns). Analogous to Fig. 3 for ACCESS1.0, ACCESS1.3, BCC-CSM1.1(m), and BCC-CSM1.1.

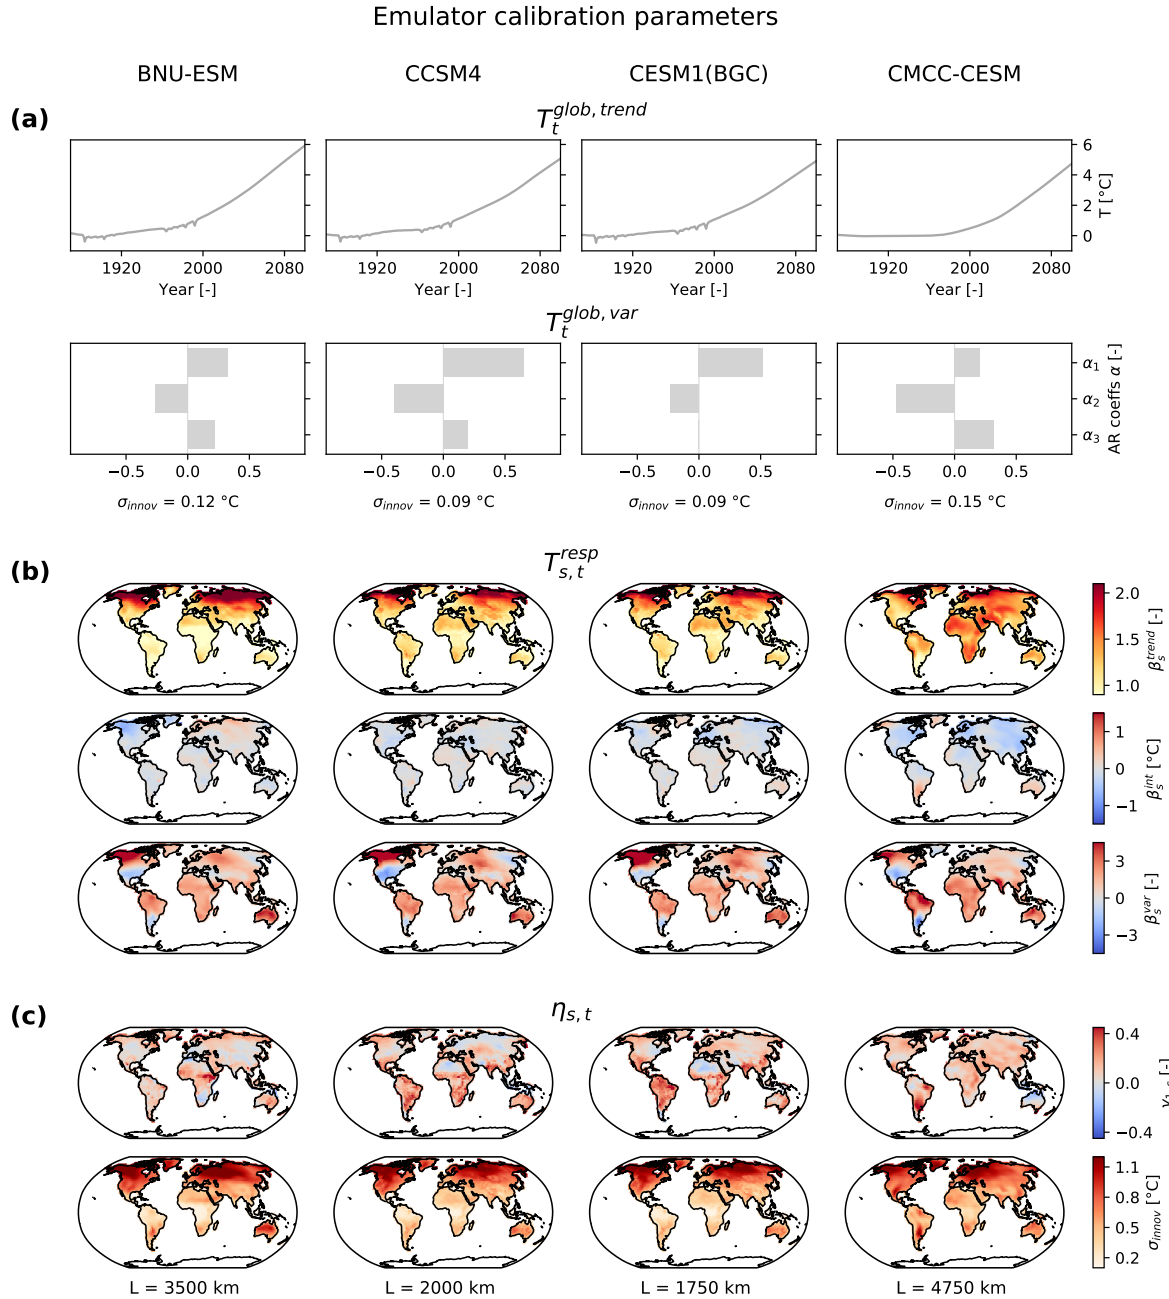

**Figure S3.** Emulator calibration parameters (rows) for four climate models (columns). Analogous to Fig. 3 for BNU-ESM, CCSM4, CESM1(BGC), and CMCC-CESM.



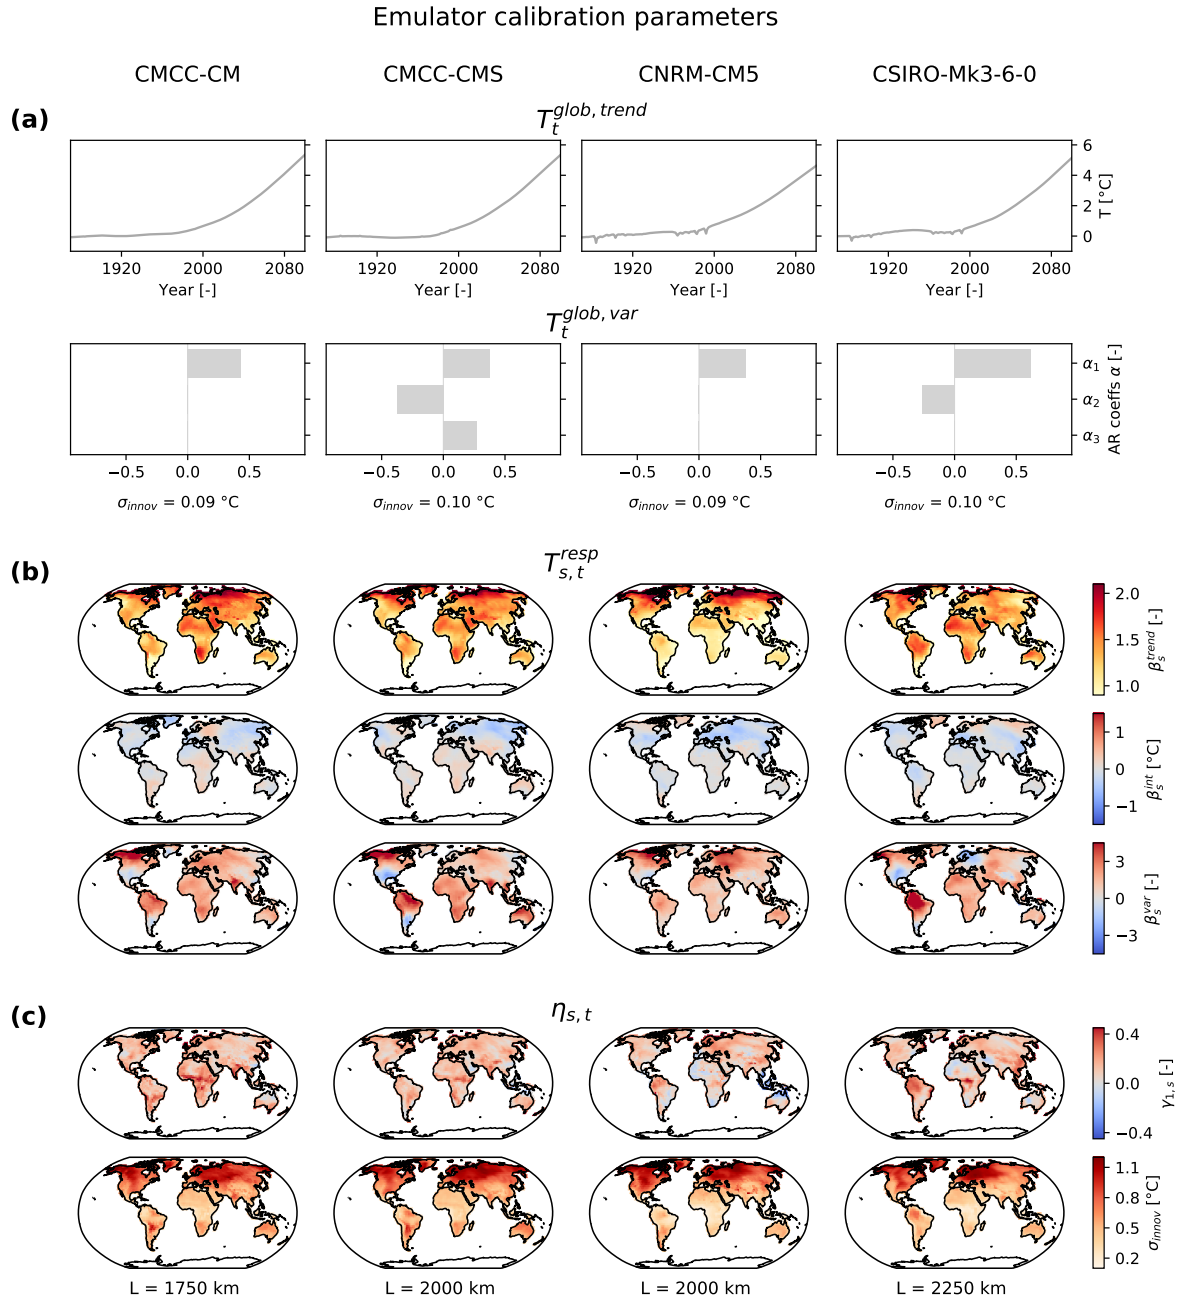

**Figure S4.** Emulator calibration parameters (rows) for four climate models (columns). Analogous to Fig. 3 for CMCC-CM, CMCC-CMS, CNRM-CM5, and CSIRO-Mk3.6.0.

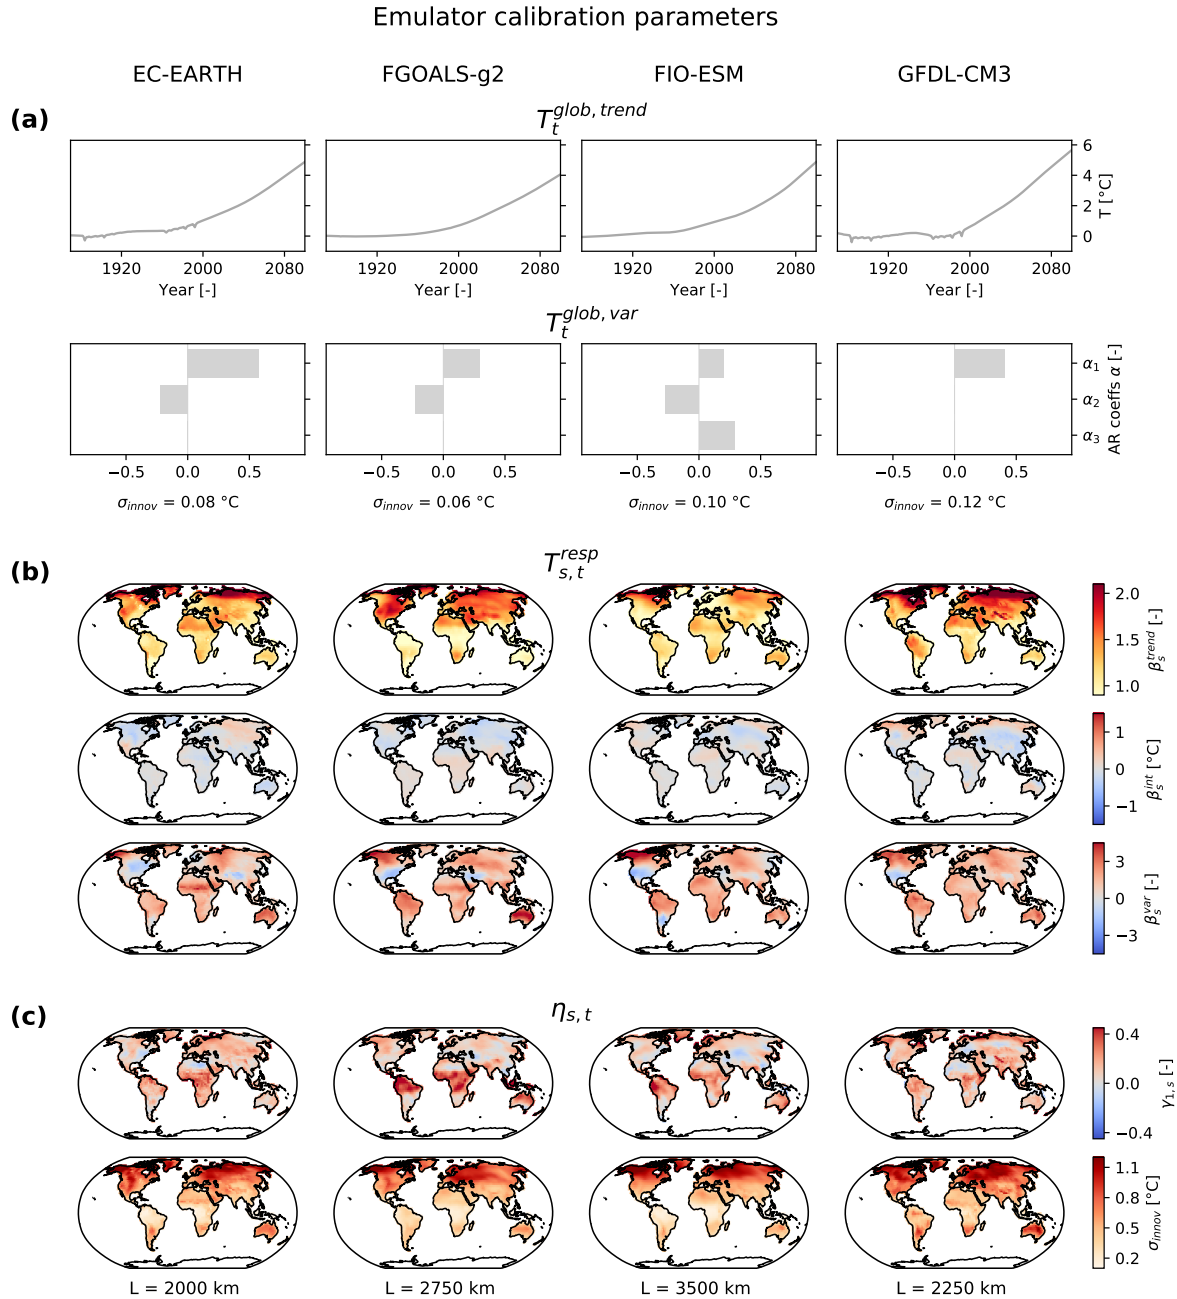

**Figure S5.** Emulator calibration parameters (rows) for four climate models (columns). Analogous to Fig. 3 for EC-EARTH, FGOALS-g2, FIO-ESM, and GFDL-CM3.

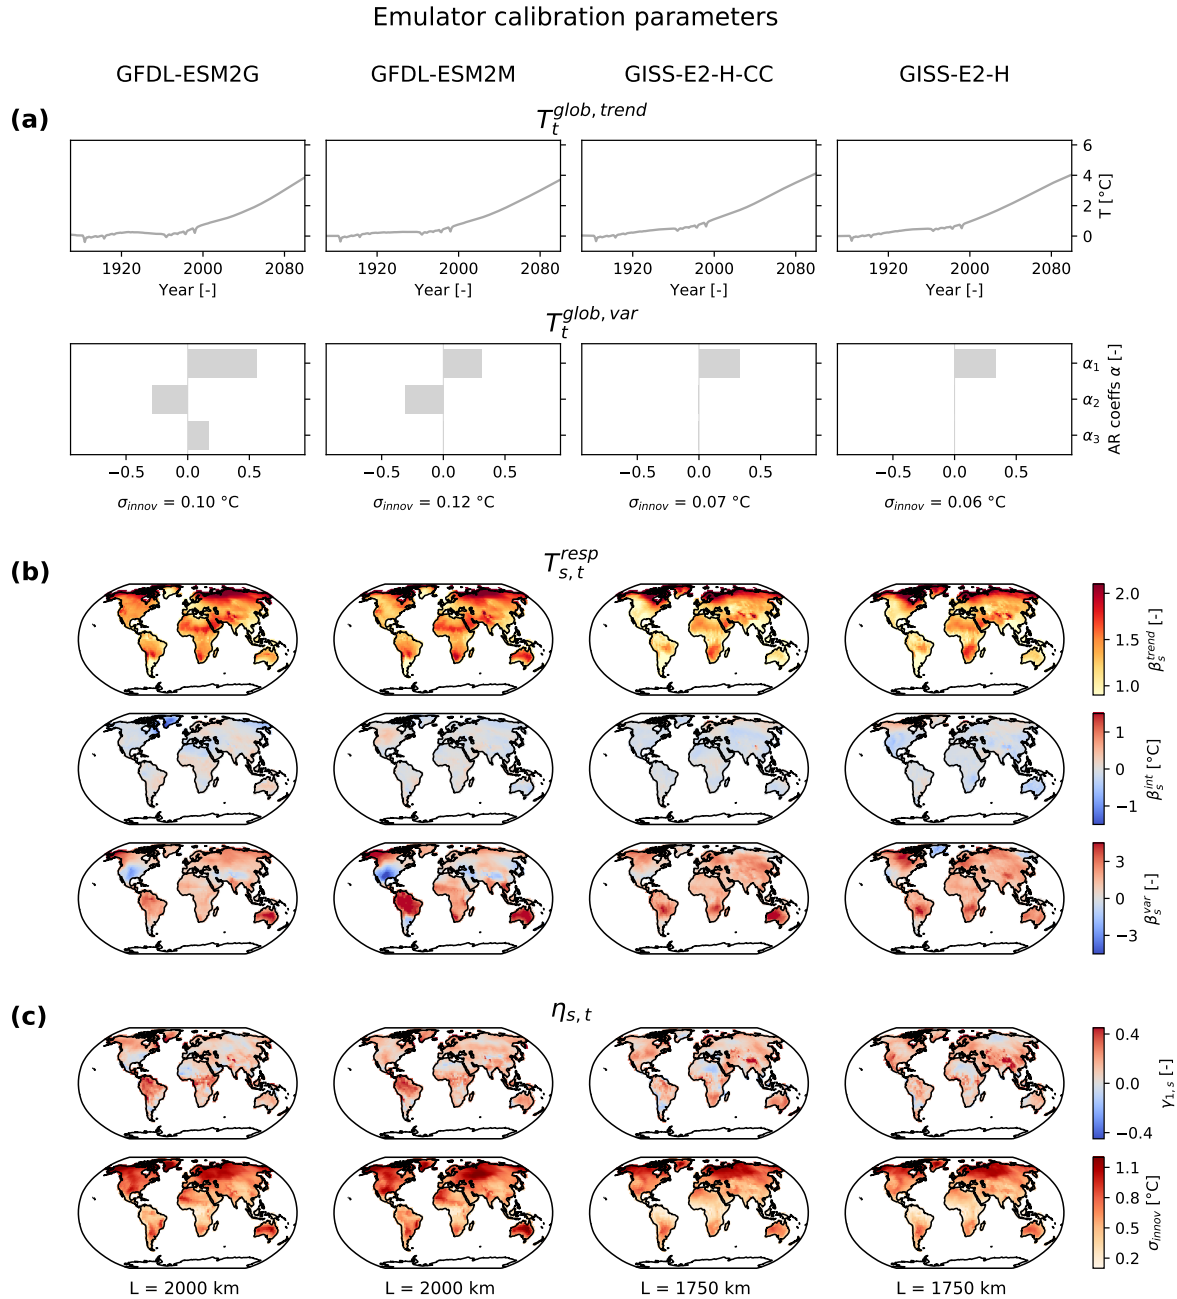

**Figure S6.** Emulator calibration parameters (rows) for four climate models (columns). Analogous to Fig. 3 for GFDL-ESM2G, GFDL-ESM2M, GISS-E2-H-CC, and GISS-E2-H.

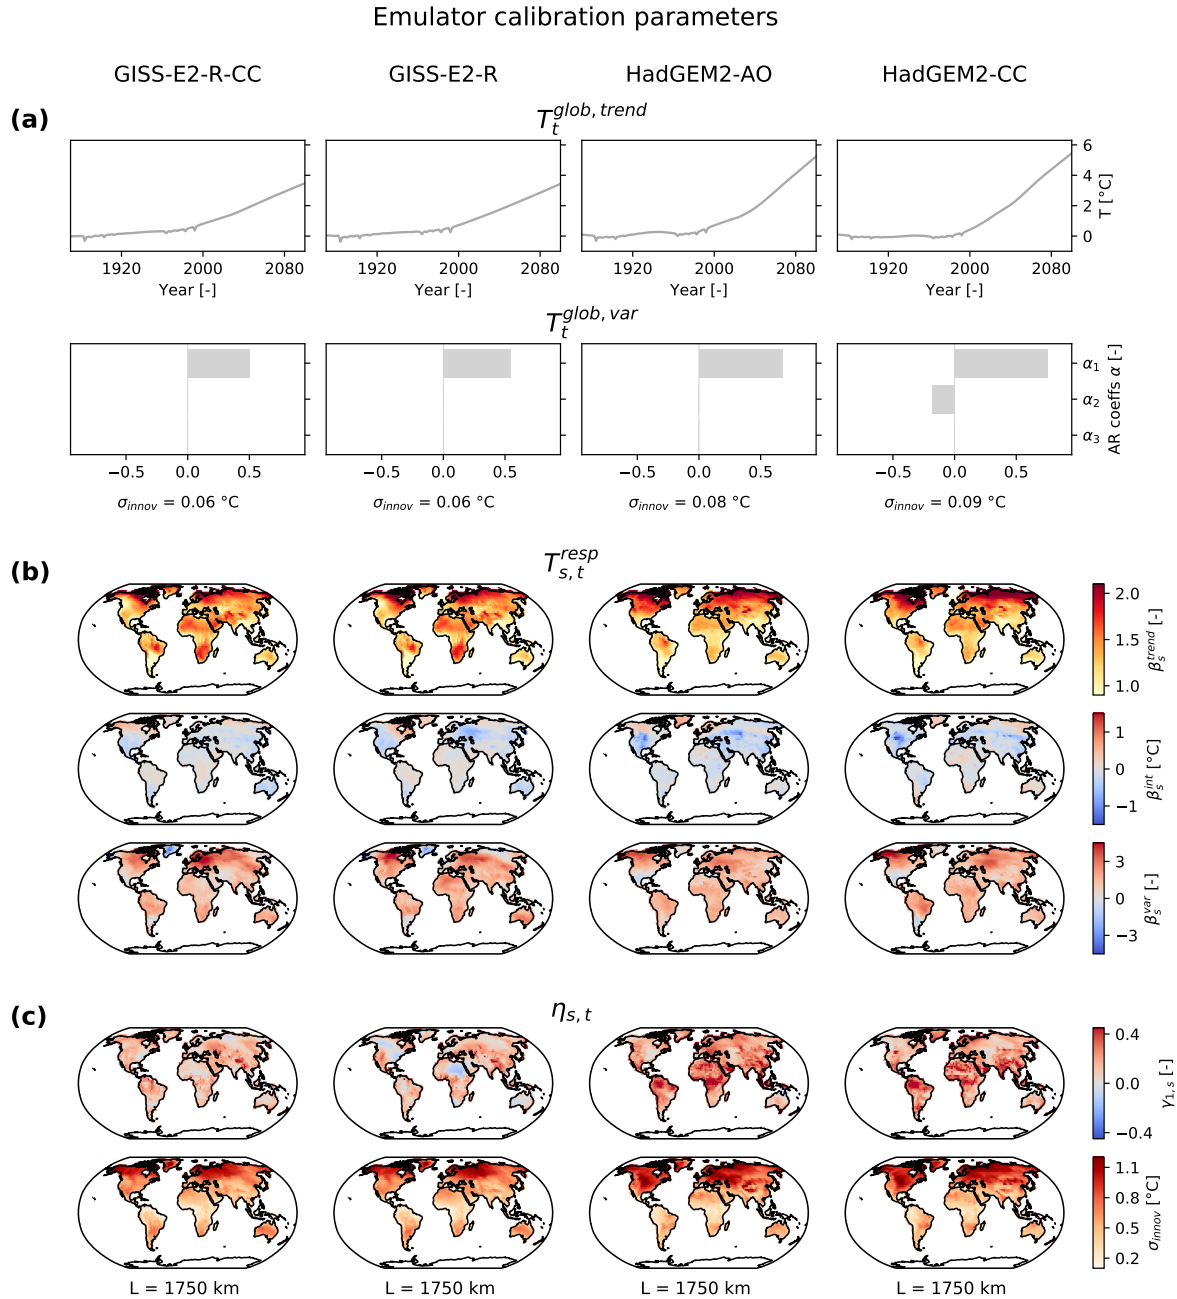

**Figure S7.** Emulator calibration parameters (rows) for four climate models (columns). Analogous to Fig. 3 for GISS-E2-R-CC, GISS-E2-R, HadGEM2-AO, HadGEM2-CC.



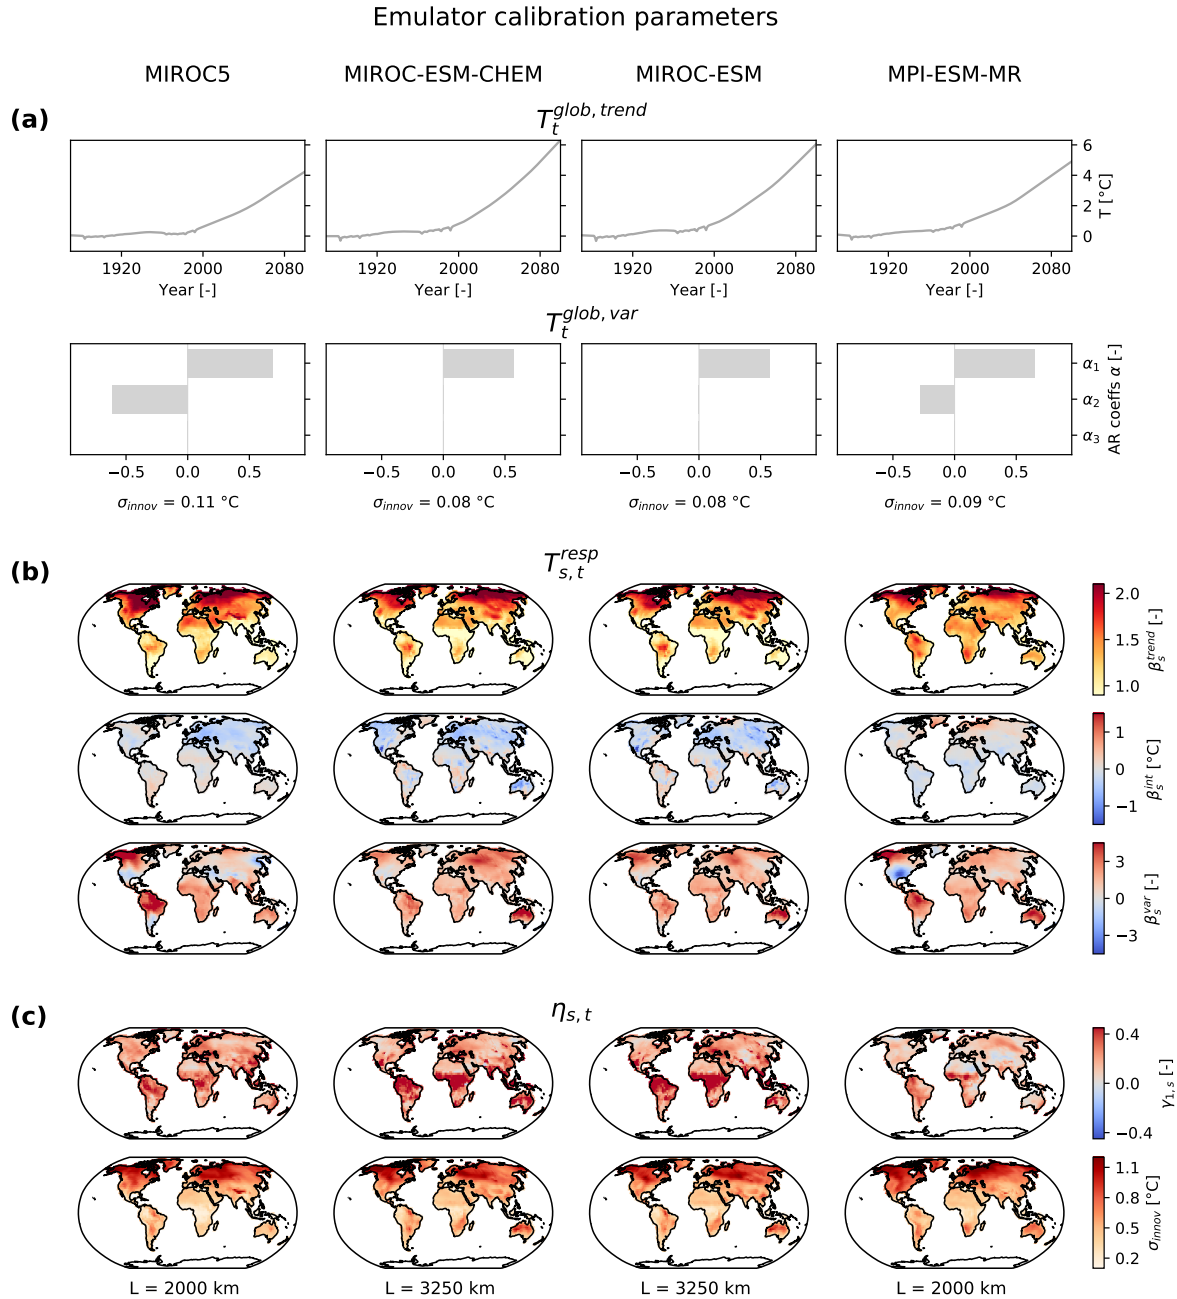

**Figure S9.** Emulator calibration parameters (rows) for four climate models (columns). Analogous to Fig. 3 for MIROC5, MIROC-ESM-CHEM, MIROC-ESM, and MPI-ESM-MR.



### Emulator calibration parameters

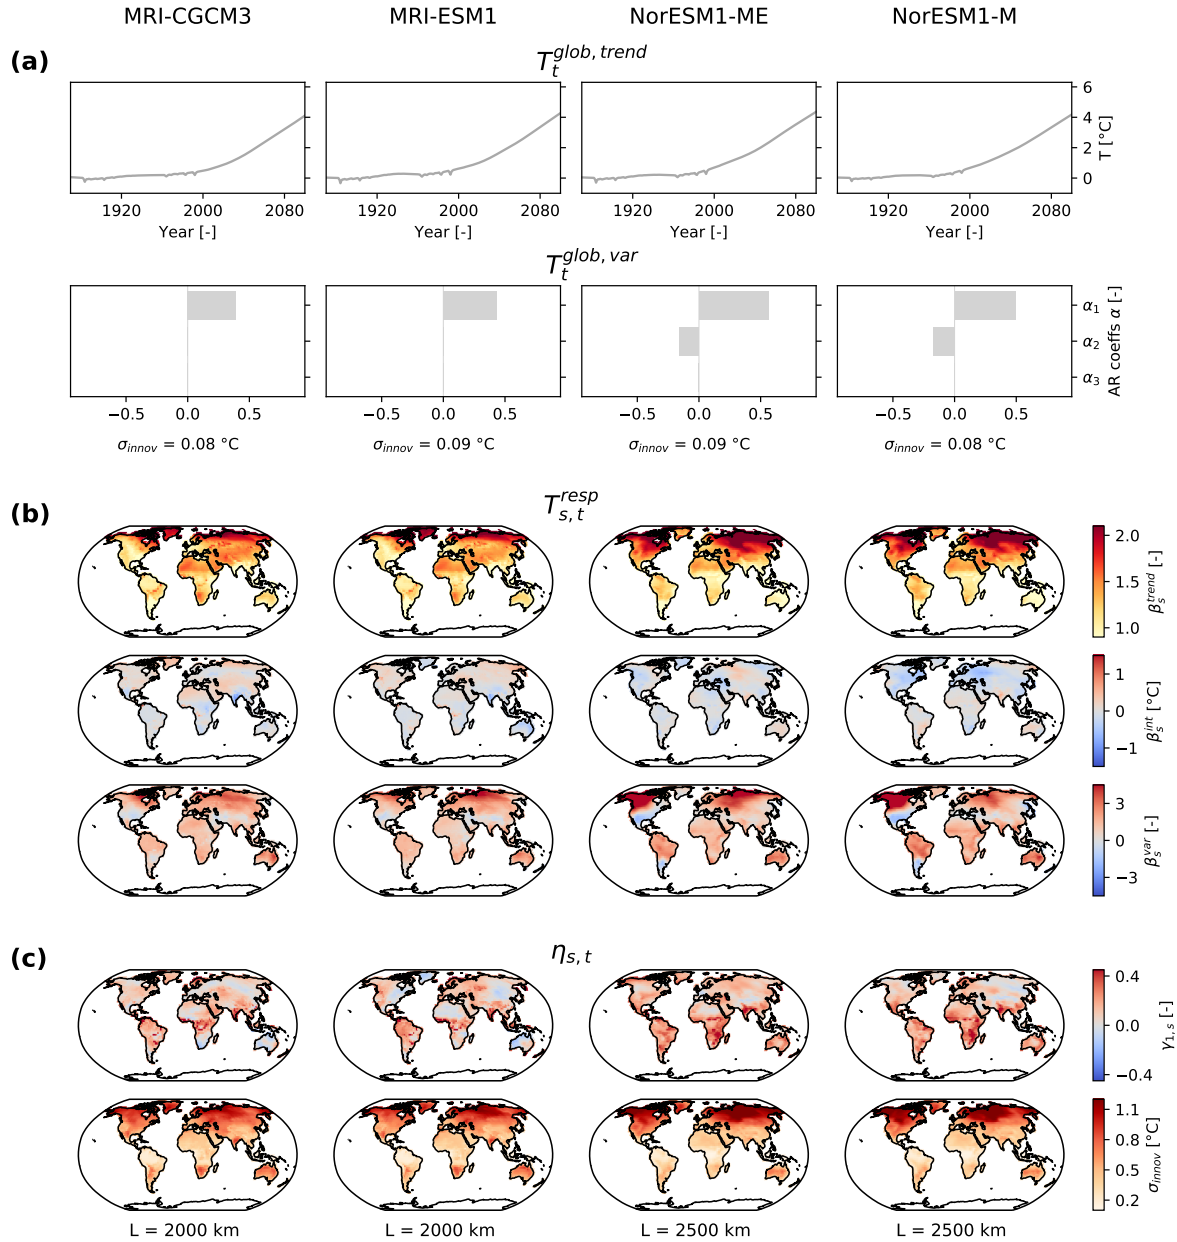

**Figure S10.** Emulator calibration parameters (rows) for four climate models (columns). Analogous to Fig. 3 for MRI-CGCM3, MRI-ESM1, NorESM1-ME, and NorESM1-M.

Comparing ESM runs, full emulations, and simple pattern scaling results for CESM1(CAM5) in different regions

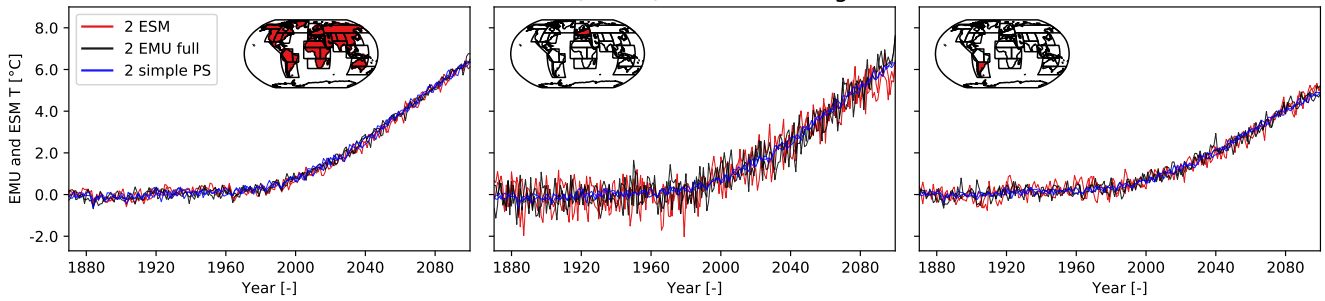

**Figure S11.** Comparison of regionally averaged temperature time series for CESM1(CAM5) test runs (red), full emulations (black), and simple pattern scaling results (blue) in three regions. The regions are (from left to right): global land, Central Europe (CEU), and Southeastern South America (SSA). The pattern scaling results at each grid point and time step are obtained by  $T_{s,t}^{ps} = \beta_{1,s}^{ps} \cdot T_t^{glob} + \beta_{0,s}^{ps}$  with the coefficients  $\beta_{1,s}^{ps}$  and  $\beta_{0,s}^{ps}$  fit with the Ordinary Least Squares (OLS) algorithm on the training run.

## References

Steinskog, D. J., Tjøstheim, D. B., and Kvamstø, N. G.: A Cautionary Note on the Use of the Kolmogorov–Smirnov Test for Normality, *Monthly Weather Review*, 135, 1151–1157, <https://doi.org/10.1175/mwr3326.1>, 2007.

- 5 Wilks, D. S.: "The stippling shows statistically significant grid points": How research results are routinely overstated and overinterpreted, and what to do about it, *Bulletin of the American Meteorological Society*, 97, 2263–2273, <https://doi.org/10.1175/BAMS-D-15-00267.1>, 2016.
